# Supplementary material
Source: PubMed Central journal article supplement (PMC4169331)
Supplement: NIHMS620770-supplement-01.pdf [file NIHMS620770-supplement-01.pdf]

## **Inventory of Supplemental Information**

Figure S1. Psychophysiological interaction analysis with the VMPFC region of interest (relates to Figure 3).

Figure S2. Correlation matrix (relates to Experimental Procedures).

Table S1. Choices to persist after setbacks and response times for decisions following controllable and uncontrollable setbacks in the low and high alternative value conditions (relates to Figure 1).

Table S2. Persistence and choices for High, Intermediate, and Low Value paths over the course of the experiment (relates to Figure 1).

Table S3. Neural regions exhibiting a main effect of setback controllability (relates to Figure 3).

Supplemental Experimental Procedures

Supplemental References
